# Supplementary material for: 57Fe Mössbauer spectroscopy and high-pressure structural analysis for the mechanism of pressure-induced unique magnetic behaviour in (cation)[FeIIFeIII(dto)3] (cation = Ph4P and nPrPh3P; dto = 1,2-dithiooxalato)
Source: Royal Society of Chemistry journal article supplement (doi:10.1039/d3dt00858d), 2023-01-01
Supplement: d3dt00858d1.pdf [file d3dt00858d1.pdf]

## Supplementary Information

$^{57}\text{Fe}$  Mössbauer Spectroscopy and High-Pressure Structural Analysis for Mechanism of Pressure-Induced Unique Magnetic Behaviour in (cation)[ $\text{Fe}^{\text{II}}\text{Fe}^{\text{III}}(\text{dto})_3$ ] (cation =  $\text{Ph}_4\text{P}$  and  $n\text{PrPh}_3\text{P}$ ; dto = 1,2-dithiooxalato)

Ryosuke Taniai,<sup>a</sup> Tsubasa Endo,<sup>a</sup> Takuya Kanetomo,<sup>a,\*</sup> Atsushi Okazawa,<sup>b</sup> Hirokazu Kadobayashi,<sup>c</sup> Saori I. Kawaguchi,<sup>c</sup> and Masaya Enomoto<sup>a,\*</sup>

<sup>a</sup> Tokyo University of Science, 1-3 Kagurazaka, Shinjuku-ku, Tokyo 162-8601, Japan

<sup>b</sup> Waseda University, 3-4-1 Okubo, Shinjuku-ku, Tokyo 169-8555, Japan

<sup>c</sup> Japan Synchrotron Radiation Research Institute (JASRI), SPring-8, Sayo, Hyogo 679-5198, Japan

a)

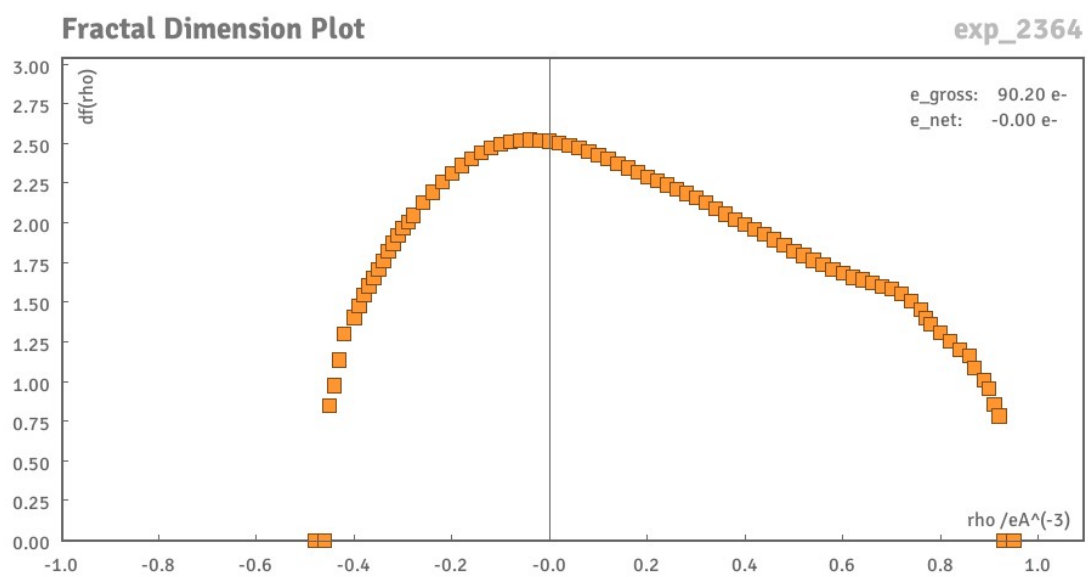

b)

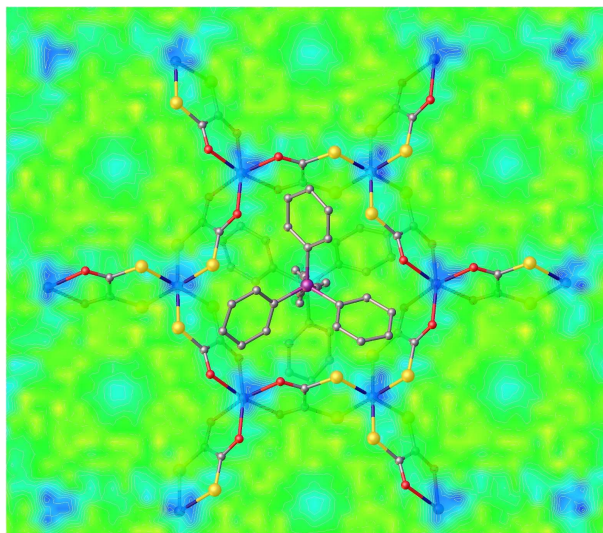

**Fig. S1.** (a) The fractal dimension distribution of residual electron density and (b) residual

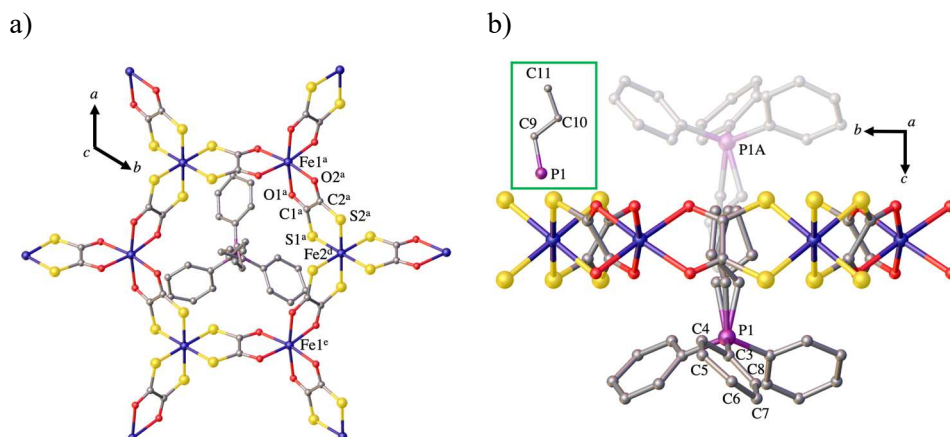

**Fig. S2.** (a) Coordination environment of  $O_6$  and  $S_6$  atoms for the two Fe ions in **1**. Symmetry code: (a)  $1+x, 1+y, +z$ ; (d)  $2-y, 1+x-y, +z$ ; (e)  $1+y-x, 2-x, +z$ . Color codes: gray, red, yellow, purple, and navy represent C, O, S, P, and Fe atoms, respectively. (b) Penetrated  $^{12}\text{PrPh}_3\text{P}$  cation in the anion layer. One of the disordered states is shown in bright colors, while the other state is shown in a pale color. The inset shows the labels of atoms in the penetrated phenyl ring of the cation.

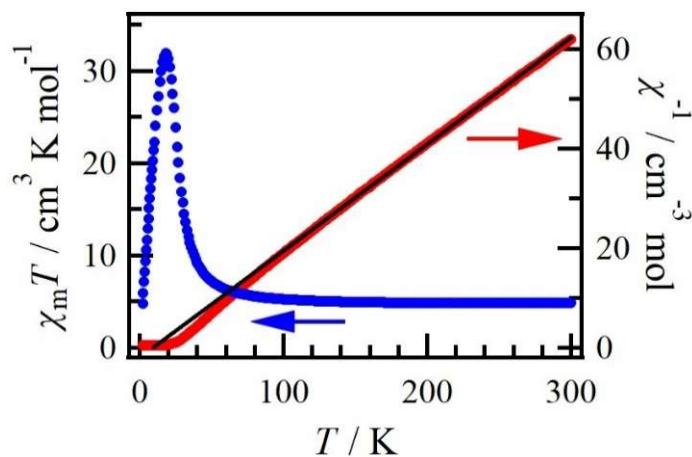

**Fig. S3.** Temperature dependence of  $\chi_m T$  (blue) and  $\chi^{-1}$  (red) for  $(^{12}\text{PrPh}_3\text{P})[\text{Fe}^{\text{II}}\text{Fe}^{\text{III}}(\text{dto})_3]$  (**3**) measured at the magnetic field of 5000 Oe in the temperature range of 2–300 K. A solid line represents the simulation derived from the Curie-Weiss equation.

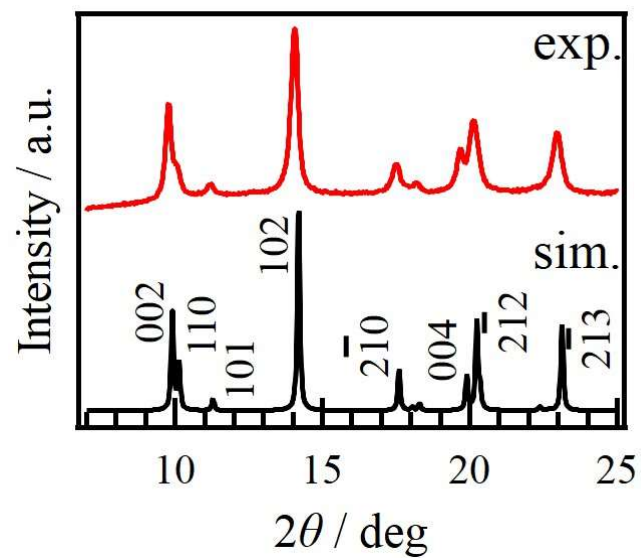

**Fig. S4.** Experimental result of powder pattern for  $(\text{PrPh}_3\text{P})[\text{Fe}^{\text{II}}\text{Fe}^{\text{III}}(\text{dto})_3]$  (**3**) at room temperature (red line) and simulated pattern from SCXRD at 93 K (black line). Both of experiments were performed under ambient pressure.

**Table S1.** Selected cell parameters at each pressure for **2**.

| Pressure / GPa       | $a / \text{\AA}$ | $c / \text{\AA}$ | $V / \text{\AA}^3$ |
|----------------------|------------------|------------------|--------------------|
| $1.0 \times 10^{-4}$ | 10.125(2)        | 18.447(3)        | 1637.8(4)          |
| 0.523(7)             | 9.911(2)         | 17.965(5)        | 1528.2(5)          |
| 0.668(3)             | 9.886(1)         | 17.867(4)        | 1512.4(4)          |
| 0.78(2)              | 9.854(1)         | 17.834(4)        | 1499.7(4)          |
| 0.88(5)              | 9.824(1)         | 17.757(4)        | 1484.2(4)          |
| 1.10(4)              | 9.789(1)         | 17.665(4)        | 1466.0(4)          |
| 1.308(3)             | 9.7537(9)        | 17.571(3)        | 1447.6(3)          |
| 1.53(8)              | 9.7188(6)        | 17.473(2)        | 1429.3(2)          |
| 1.77(4)              | 9.684(1)         | 17.372(3)        | 1410.7(3)          |
| 2.12(6)              | 9.655(1)         | 17.266(4)        | 1393.9(4)          |
| 3.2(1)               | 9.5716(9)        | 16.997(3)        | 1348.5(3)          |
| 4.2(1)               | 9.4950(9)        | 16.783(3)        | 1310.4(3)          |
| 5.2(1)               | 9.4319(9)        | 16.617(3)        | 1280.2(3)          |

**Table S2.** Selected cell parameters at each pressure for **3**.

| Pressure / GPa       | $a / \text{\AA}$ | $c / \text{\AA}$ | $V / \text{\AA}^3$ |
|----------------------|------------------|------------------|--------------------|
| $1.0 \times 10^{-4}$ | 10.127(2)        | 18.049(4)        | 1603.1(5)          |
| 0.46(3)              | 9.949(2)         | 17.526(5)        | 1502.3(6)          |
| 0.60(2)              | 9.925(3)         | 17.46(1)         | 1489.5(9)          |
| 0.67(1)              | 9.905(3)         | 17.40(1)         | 1479(1)            |
| 0.86(2)              | 9.873(3)         | 17.28(1)         | 1459(1)            |
| 0.96(2)              | 9.852(3)         | 17.23(1)         | 1448(1)            |
| 1.13(3)              | 9.825(3)         | 17.15(1)         | 1434(1)            |
| 1.40(3)              | 9.783(2)         | 17.037(7)        | 1412.1(7)          |
| 1.61(3)              | 9.753(2)         | 16.964(8)        | 1397.5(8)          |
| 1.91(4)              | 9.720(3)         | 16.842(5)        | 1378.0(7)          |
| 2.08(3)              | 9.701(4)         | 16.806(6)        | 1369.8(8)          |
| 2.52(3)              | 9.648(3)         | 16.71(1)         | 1347(1)            |
| 3.09(6)              | 9.583(3)         | 16.58(2)         | 1319(1)            |
| 4.01(5)              | 9.503(3)         | 16.41(1)         | 1283.8(9)          |
| 5.13(9)              | 9.447(6)         | 16.21(2)         | 1253(2)            |
